# Supplementary material
Source: PubMed Central journal article supplement (PMC6622448)

Supplemental Figure S1

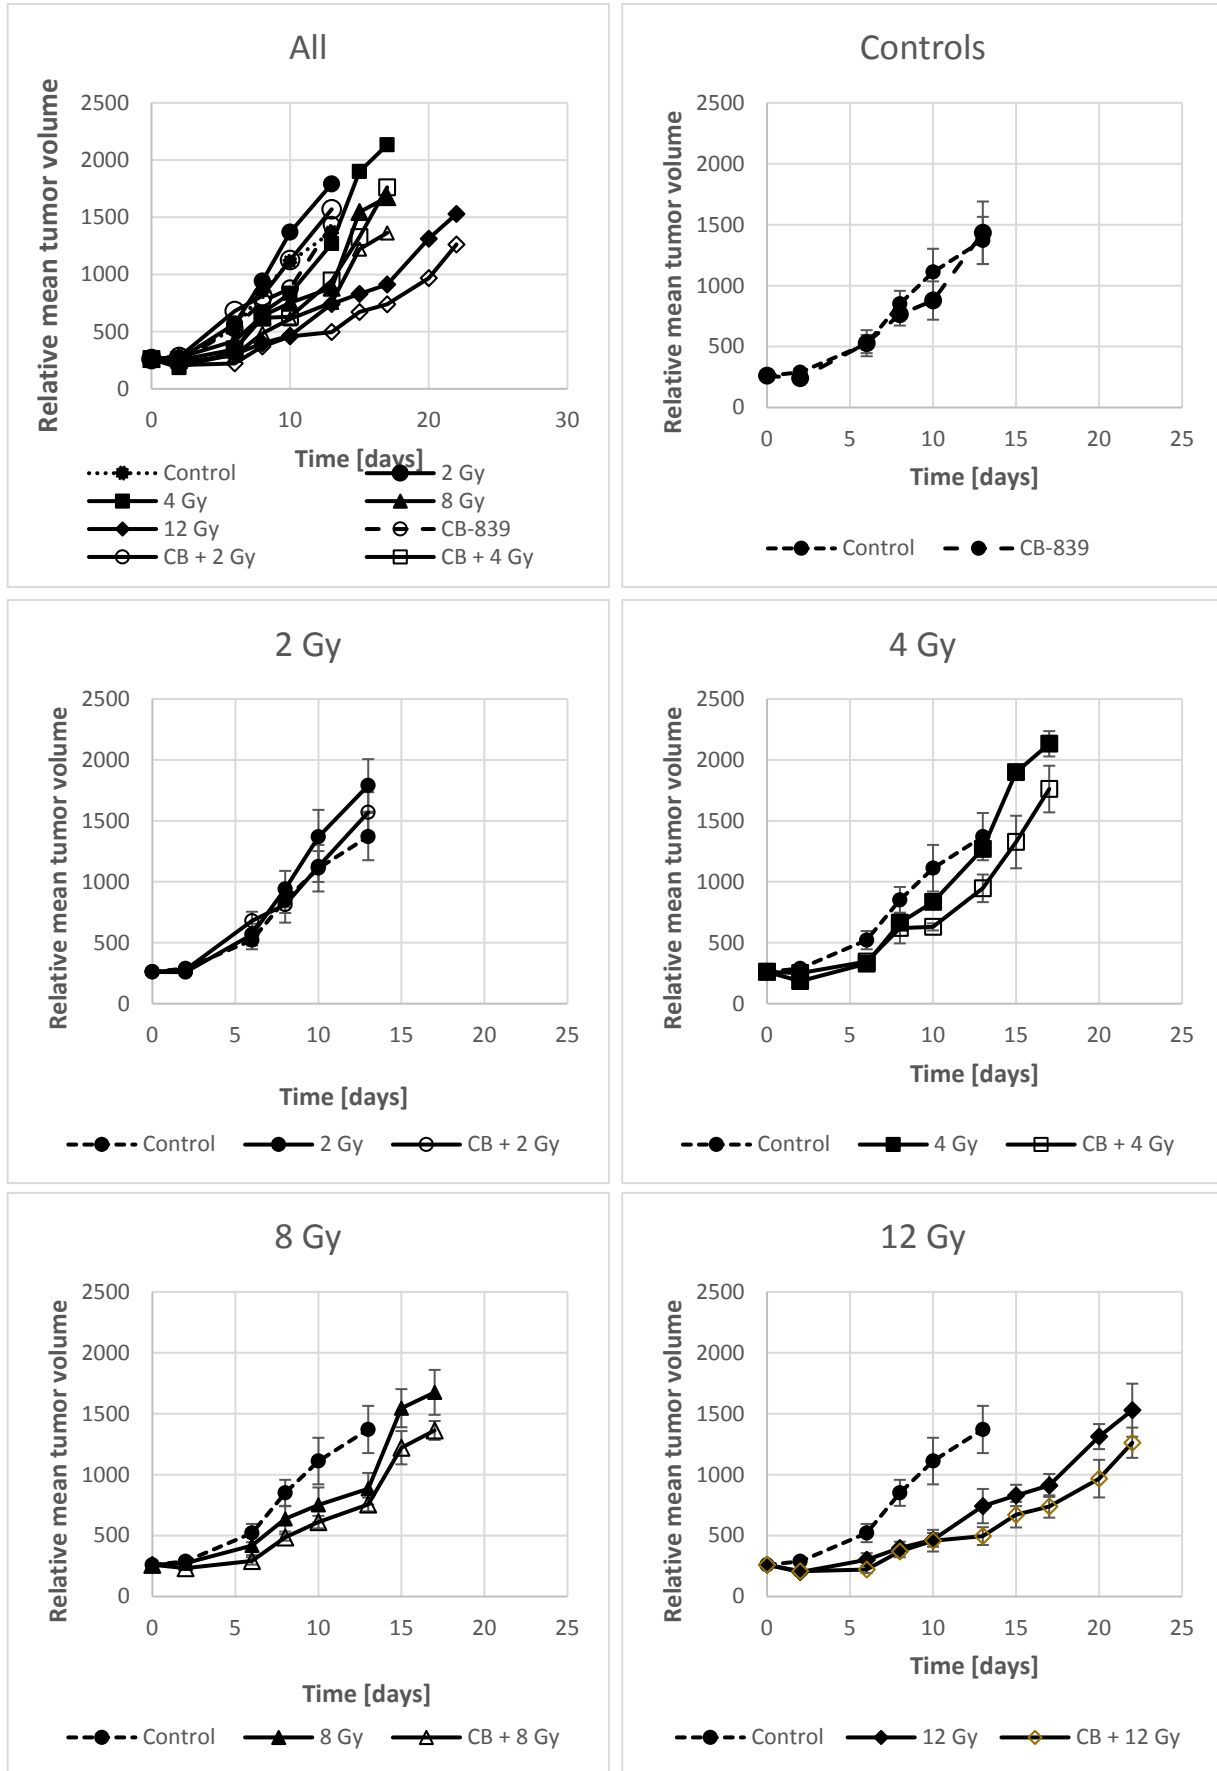

Supplement: NIHMS1520206-supplement-1.pdf [file NIHMS1520206-supplement-1.pdf]
